# Supplementary material
Source: PubMed Central journal article supplement (PMC6843703)
Supplement: ao9b01977_si_001.pdf [file ao9b01977_si_001.pdf]

# Supporting Information

## Highly porous willow wood-derived activated carbon for high performance supercapacitor electrodes

Josphat Phiri\*, Jinze Dou, Tapani Vuorinen, Patrick A. C. Gane\*, Thaddeus C. Maloney\*

Aalto University, School of Chemical Engineering, Department of Bioproducts and Biosystems, P.O. Box 16300, 00076 Aalto, Finland

\*Corresponding authors:

josphat.phiri@aalto.fi; patrick.gane@aalto.fi; thaddeus.maloney@aalto.fi

WW-KOH0

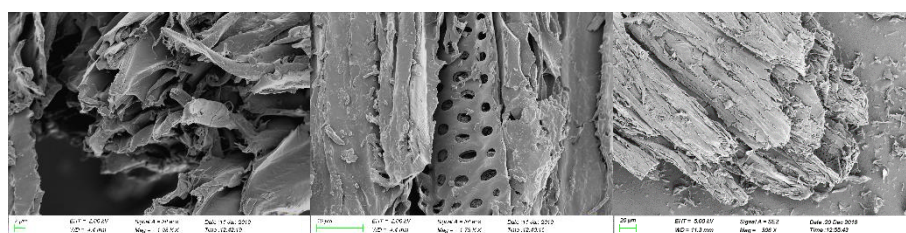

WW-KOH1

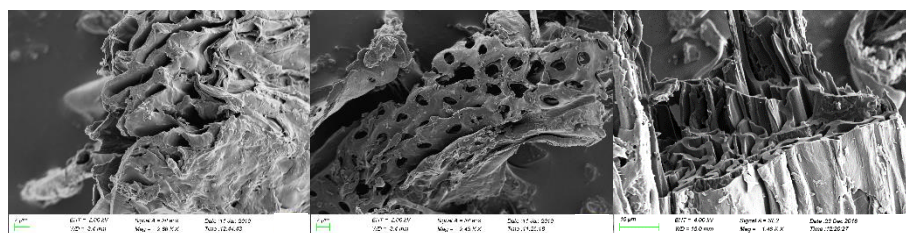

WW-KOH3

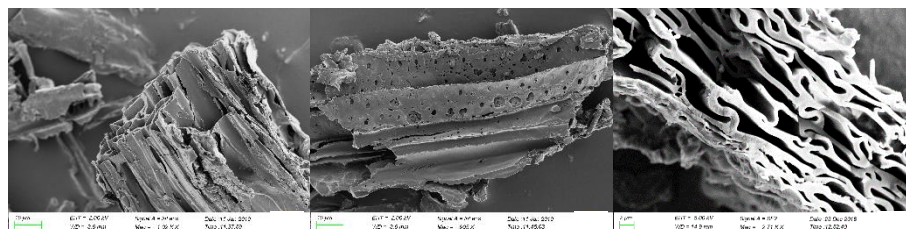

WW-KOH6

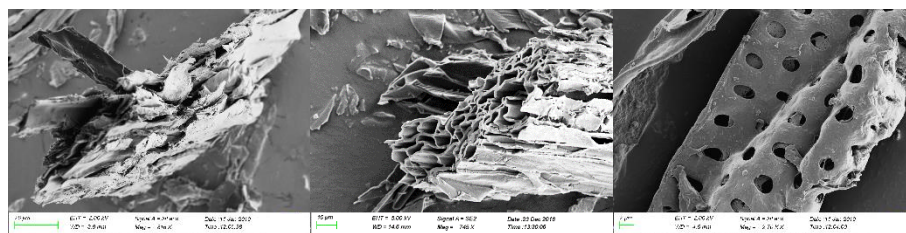

WW-KOH9

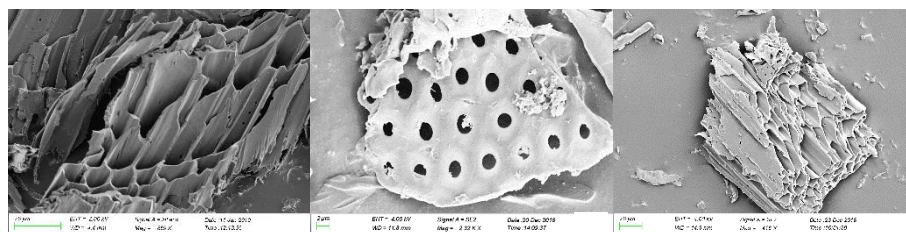

Figure S1 SEM images of the prepared samples showing different morphologies

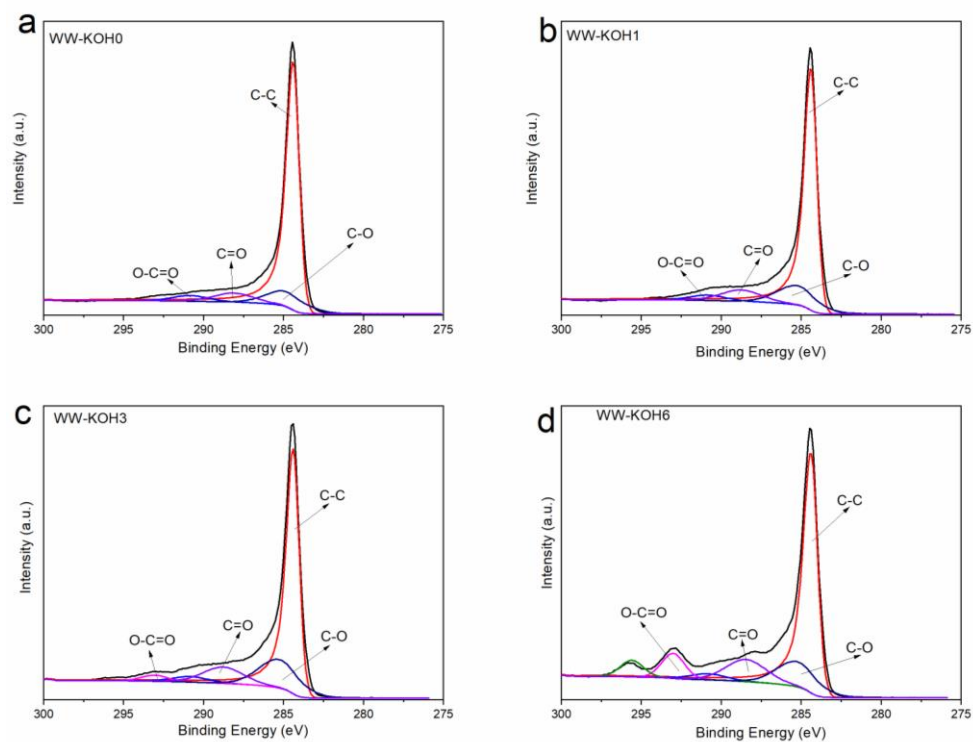

Figure S2 C1s for (a) WW-KOH0, (b) WW-KOH1 (c) WW-KOH3 (d) WW-KOH6

Table S1 XPS surface characteristics of the activated carbon samples

| Samples | Atomic concentration, at% |       |       |       |       |       |
|---------|---------------------------|-------|-------|-------|-------|-------|
|         | C                         | O     | C=C   | C-O   | C=O   | O-C=O |
| WW-KOH0 | 93.15                     | 5.15  | 71.35 | 14.74 | 8.93  | 4.98  |
| WW-KOH1 | 93.38                     | 5.58  | 66.11 | 18.35 | 10.92 | 4.62  |
| WW-KOH3 | 88.57                     | 8.87  | 59.14 | 23.27 | 13.47 | 4.13  |
| WW-KOH6 | 82.42                     | 12.40 | 59.82 | 19.13 | 16.86 | 4.18  |
| WW-KOH9 | 85.50                     | 11.27 | 60.75 | 21.06 | 13.95 | 4.24  |

Table S2 Comparison of electrochemical performance of WW derived carbon with other biomass sources in aqueous electrolytes in a three-electrode configuration system.

| Material                 | Activating reagent  | SSA, $\text{m}^2 \text{g}^{-1}$ | Capacitance, $\text{F g}^{-1}$ (current density/scan rate) | Electrolyte                          | Ref.          |
|--------------------------|---------------------|---------------------------------|------------------------------------------------------------|--------------------------------------|---------------|
| Pistachio shells         | KOH/CO <sub>2</sub> | 2145                            | 122 (25 $\text{mV s}^{-1}$ )                               | 0.5 M H <sub>2</sub> SO <sub>4</sub> | <sup>1</sup>  |
| Neem leaves              | -                   | 1 230                           | 400 (0.5 $\text{A g}^{-1}$ )                               | 1 M H <sub>2</sub> SO <sub>4</sub>   | <sup>2</sup>  |
| Eggplant                 | -                   | 950                             | ~70 (20 $\text{A g}^{-1}$ )                                | 6 M KOH                              | <sup>3</sup>  |
| Corn cob                 | Steam               | 1 210                           | 314 (5 $\text{mV s}^{-1}$ )                                | 6 M KOH                              | <sup>4</sup>  |
| Laminaria japonica       | KOH                 | 1 986                           | 381 (1 $\text{A g}^{-1}$ )                                 | 6 M KOH                              | <sup>5</sup>  |
| Rhus typhina fruits      | KOH                 | 2 675                           | 474 (1 $\text{A g}^{-1}$ )                                 | 6 M KOH                              | <sup>6</sup>  |
| Batata leaves and stalks | KOH                 | 3 114                           | 350 (1 $\text{A g}^{-1}$ )                                 | 6 M KOH                              | <sup>7</sup>  |
| Nori                     | ZnCl <sub>2</sub>   | 832                             | 220 (0.1 $\text{A g}^{-1}$ )                               | 6 M KOH                              | <sup>8</sup>  |
| Willow catkins           | KOH                 | 1 533                           | 298 (0.5 $\text{A g}^{-1}$ )                               | 6 M KOH                              | <sup>9</sup>  |
| Kraft pulp               | KOH                 | 2 045                           | 374 (1 $\text{A g}^{-1}$ )                                 | 6 M KOH                              | <sup>10</sup> |

|                       |                                     |       |                               |                                    |           |
|-----------------------|-------------------------------------|-------|-------------------------------|------------------------------------|-----------|
| Perilla frutescens    | -                                   | 655   | 270 (0.5 A g <sup>-1</sup> )  | 6 M KOH                            | 11        |
| Dry elm samara        | KOH                                 | 1 171 | 470 (1 A g <sup>-1</sup> )    | 6 M KOH                            | 12        |
| Water bamboo          | KOH                                 | 2 352 | 268 (1 A g <sup>-1</sup> )    | 6M KOH                             | 13        |
| Corn grain            | KOH                                 | 3 199 | 257 (1 mA cm <sup>-2</sup> )  | 6M KOH                             | 14        |
| Sugar cane bagasse    | ZnCl <sub>2</sub>                   | 1 892 | 268 (2 mV s <sup>-1</sup> )   | 6M KOH                             | 15        |
| Sun flower seed shell | KOH                                 | 2 509 | 311 (0.25 A g <sup>-1</sup> ) | 30wt.% KOH                         | 16        |
| Auricularia           | ZnCl <sub>2</sub>                   | 1 607 | 347 (1 A g <sup>-1</sup> )    | 6M KOH                             | 17        |
| Lignin                | KOH                                 | 907   | 165 (0.05 A g <sup>-1</sup> ) | 1 M H <sub>2</sub> SO <sub>4</sub> | 18        |
| Celtuce leaves        | KOH                                 | 3 404 | 421 (0.5 A g <sup>-1</sup> )  | 2M KOH                             | 19        |
| Coconut shell         | Steam                               | 1 532 | 228 (5 mV s <sup>-1</sup> )   | 6M KOH                             | 20        |
| Pomelo peel           | KOH                                 | 2 725 | 342 (0.2 A g <sup>-1</sup> )  | 6M KOH                             | 21        |
| Banana fibers         | ZnCl <sub>2</sub>                   | 1 097 | 74 (500 mA g <sup>-1</sup> )  | 1M Na <sub>2</sub> SO <sub>4</sub> | 22        |
| Coconut shell         | ZnCl <sub>2</sub>                   | 1 874 | 268 (1 A g <sup>-1</sup> )    | 6M KOH                             | 23        |
| Shiitake mushroom     | H <sub>3</sub> PO <sub>4</sub> /KOH | 2 988 | 306 (1 A g <sup>-1</sup> )    | 6M KOH                             | 24        |
| Cashmere              | KOH                                 | 1 358 | 236 (1 A g <sup>-1</sup> )    | 6M KOH                             | 25        |
| Ginkgo shell          | KOH                                 | 1 775 | 178 (500 mV s <sup>-1</sup> ) | 6M KOH                             | 26        |
| Cotton                | KOH                                 | 1 563 | 314 (0.1 A g <sup>-1</sup> )  | 6 M KOH                            | 27        |
| Fungus                | KOH                                 | 1 103 | 374 (0.5 A g <sup>-1</sup> )  | 6 M KOH                            | 28        |
| Tea leaves            | KOH                                 | 2 841 | 330 (1 A g <sup>-1</sup> )    | 6 M KOH                            | 29        |
| Brussel sprouts       | KOH                                 | 2 410 | 255 (0.5 A g <sup>-1</sup> )  | 6 M KOH                            | 30        |
| Argan seed shells     | KOH                                 | 2 100 | 335 (125 mA g <sup>-1</sup> ) | 1 M H <sub>2</sub> SO <sub>4</sub> | 31        |
| Willow wood           | KOH                                 | 2 800 | 394 (1 A g <sup>-1</sup> )    | 6 M KOH                            | This work |

## References

1. Hu, C.; Wang, C.; Wu, F.; Tseng, R. Characterization of pistachio shell-derived carbons activated by a combination of KOH and CO<sub>2</sub> for electric double-layer capacitors. *Electrochim. Acta* **2007**, *52*, 2498-2505.
2. Biswal, M.; Banerjee, A.; Deo, M.; Ogale, S. From dead leaves to high energy density supercapacitors. *Energy Environ. Sci.* **2013**, *6*, 1249-1259.
3. Li, Z.; Lv, W.; Zhang, C.; Li, B.; Kang, F.; Yang, Q. A sheet-like porous carbon for high-rate supercapacitors produced by the carbonization of an eggplant. *Carbon* **2015**, *92*, 11-14.
4. Qu, W.; Xu, Y.; Lu, A.; Zhang, X.; Li, W. Converting biowaste corncob residue into high value added porous carbon for supercapacitor electrodes. *Bioresour. Technol.* **2015**, *189*, 285-291.
5. wang, j.; Qin, F.; Guo, Z.; Shen, W. Oxygen-and nitrogen-enriched honeycomb-like porous carbon from laminaria japonica with excellent supercapacitor performance in aqueous solution. *ACS Sustainable Chem. Eng.* **2019**, *7*, 11550-11563.
6. Wei, X.; Wei, J.; Li, Y.; Zou, H. Robust hierarchically interconnected porous carbons derived from discarded Rhus typhina fruits for ultrahigh capacitive performance supercapacitors. *J. Power Sources* **2019**, *414*, 13-23.
7. Wei, X.; Li, Y.; Gao, S. Biomass-derived interconnected carbon nanoring electrochemical capacitors with high performance in both strongly acidic and alkaline electrolytes. *J. Mater. Chem. A* **2016**, *5*, 181-188.
8. Wang, C.; Liu, T. Nori-based N, O, S, Cl co-doped carbon materials by chemical activation of ZnCl<sub>2</sub> for supercapacitor. *J. Alloys Compd.* **2017**, *696*, 42-50.
9. Wang, K.; Zhao, N.; Lei, S.; Yan, R.; Tian, X.; Wang, J.; Song, Y.; Xu, D.; Guo, Q.; Liu, L. Promising biomass-based activated carbons derived from willow catkins for high performance supercapacitors. *Electrochim. Acta* **2015**, *166*, 1-11.
10. Mo, R.; Zhao, Y.; Zhao, M.; Wu, M.; Wang, C.; Li, J.; Kuga, S.; Huang, Y. Graphene-like porous carbon from sheet cellulose as electrodes for supercapacitors. *Chem. Eng. J.* **2018**, *346*, 104-112.
11. Liu, B.; Liu, Y.; Chen, H.; Yang, M.; Li, H. Oxygen and nitrogen co-doped porous carbon nanosheets derived from *Perilla frutescens* for high volumetric performance supercapacitors. *J. Power Sources* **2017**, *341*, 309-317.
12. Chen, C.; Yu, D.; Zhao, G.; Du, B.; Tang, W.; Sun, L.; Sun, Y.; Besenbacher, F.; Yu, M. Three-dimensional scaffolding framework of porous carbon nanosheets derived from plant wastes for high-performance supercapacitors. *Nano Energy* **2016**, *27*, 377-389.

13. Li, J.; Wu, Q. Water bamboo-derived porous carbons as electrode materials for supercapacitors. *New J. Chem.* **2015**, *39*, 3859-3864.
14. Balathanigaimani, M.; Shim, W.; Lee, M.; Kim, C.; Lee, J.; Moon, H. Highly porous electrodes from novel corn grains-based activated carbons for electrical double layer capacitors. *Electrochem. Commun.* **2008**, *10*, 868-871.
15. Hao, P.; Zhao, Z.; Tian, J.; Li, H.; Sang, Y.; Yu, G.; Cai, H.; Liu, H.; Wong, C.; Umar, A. Hierarchical porous carbon aerogel derived from bagasse for high performance supercapacitor electrode. *Nanoscale* **2014**, *6*, 12120-12129.
16. Li, X.; Xing, W.; Zhuo, S.; Zhou, J.; Li, F.; Qiao, S.; Lu, G. Preparation of capacitor's electrode from sunflower seed shell. *Bioresour. Technol.* **2011**, *102*, 1118-1123.
17. Jiang, L.; Sheng, L.; Chen, X.; Wei, T.; Fan, Z. Construction of nitrogen-doped porous carbon buildings using interconnected ultra-small carbon nanosheets for ultra-high rate supercapacitors. *J. Mater. Chem. A* **2016**, *4*, 11388-11396.
18. Zhang, W.; Lin, H.; Lin, Z.; Yin, J.; Lu, H.; Liu, D.; Zhao, M. 3 D Hierarchical Porous Carbon for Supercapacitors Prepared from Lignin through a Facile Template-Free Method. *ChemSusChem* **2015**, *8*, 2114-2122.
19. Wang, R.; Wang, P.; Yan, X.; Lang, J.; Peng, C.; Xue, Q. Promising porous carbon derived from celtuce leaves with outstanding supercapacitance and CO<sub>2</sub> capture performance. *ACS Appl. Mater. Interfaces* **2012**, *4*, 5800-5806.
20. Mi, J.; Wang, X.; Fan, R.; Qu, W.; Li, W. Coconut-shell-based porous carbons with a tunable micro/mesopore ratio for high-performance supercapacitors. *Energy Fuels* **2012**, *26*, 5321-5329.
21. Liang, Q.; Ye, L.; Huang, Z.; Xu, Q.; Bai, Y.; Kang, F.; Yang, Q. A honeycomb-like porous carbon derived from pomelo peel for use in high-performance supercapacitors. *Nanoscale* **2014**, *6*, 13831-13837.
22. Subramanian, V.; Luo, C.; Stephan, A. M.; Nahm, K.; Thomas, S.; Wei, B. Supercapacitors from activated carbon derived from banana fibers. *J. Phys. Chem. C* **2007**, *111*, 7527-7531.
23. Sun, L.; Tian, C.; Li, M.; Meng, X.; Wang, L.; Wang, R.; Yin, J.; Fu, H. From coconut shell to porous graphene-like nanosheets for high-power supercapacitors. *J. Mater. Chem. A* **2013**, *1*, 6462-6470.
24. Cheng, P.; Gao, S.; Zang, P.; Yang, X.; Bai, Y.; Xu, H.; Liu, Z.; Lei, Z. Hierarchically porous carbon by activation of shiitake mushroom for capacitive energy storage. *Carbon* **2015**, *93*, 315-324.
25. Zhou, L.; Cao, H.; Zhu, S.; Hou, L.; Yuan, C. Hierarchical micro-/mesoporous N-and O-enriched carbon derived from disposable cashmere: a competitive cost-effective material for high-performance electrochemical capacitors. *Green Chem.* **2015**, *17*, 2373-2382.

26. Jiang, L.; Yan, J.; Hao, L.; Xue, R.; Sun, G.; Yi, B. High rate performance activated carbons prepared from ginkgo shells for electrochemical supercapacitors. *Carbon* **2013**, *56*, 146-154.
27. Song, K.; Song, W.; Fan, L. Scalable fabrication of exceptional 3D carbon networks for supercapacitors. *J. Mater. Chem. A* **2015**, *3*, 16104-16111.
28. Long, C.; Chen, X.; Jiang, L.; Zhi, L.; Fan, Z. Porous layer-stacking carbon derived from in-built template in biomass for high volumetric performance supercapacitors. *Nano Energy* **2015**, *12*, 141-151.
29. Peng, C.; Yan, X.; Wang, R.; Lang, J.; Ou, Y.; Xue, Q. Promising activated carbons derived from waste tea-leaves and their application in high performance supercapacitors electrodes. *Electrochim. Acta* **2013**, *87*, 401-408.
30. Li, J.; Zan, G.; Wu, Q. Nitrogen and sulfur self-doped porous carbon from brussel sprouts as electrode materials for high stable supercapacitors. *RSC Adv.* **2016**, *6*, 57464-57472.
31. Elmouwahidi, A.; Zapata-Benabithé, Z.; Carrasco-Marín, F.; Moreno-Castilla, C. Activated carbons from KOH-activation of argan (*Argania spinosa*) seed shells as supercapacitor electrodes. *Bioresour. Technol.* **2012**, *111*, 185-190.
